# Supplementary material for: Distinct, IgG1-driven antibody response landscapes demarcate individuals with broadly HIV-1 neutralizing activity
Source: PubMed Central journal article supplement — J Exp Med. 2018 Jun 4;215(6):1589–608. doi: 10.1084/jem.20180246 (PMC5987927; doi:10.1084/jem.20180246), 2018-06-04
Supplement: JEM_20180246_sm.pdf [file JEM_20180246_sm.pdf]

## Supplemental material

Kadelka et al., <https://doi.org/10.1084/jem.20180246>

Tables S1–S5 are included as separate Excel documents. Table S1 contains all raw data (patient characteristics, relative binding activities, the effective measured binding responses [MFIs], and bnAb specificities for the 105 individuals with highest bnAb activity). Table S2 shows the characteristics of the various patient subpopulations analyzed in this study. Table S3 contains the detailed regression results of the analyses shown in [Fig. 2](#) and [Fig. 3](#). Table S4 contains the mean AUC values for univariable and multivariable prediction models of neutralization breadth shown in [Fig. 8](#). Table S5 contains the detailed regression results of the analyses shown in [Fig. 9](#).
